1 **Title: High burden of anemia and malnutrition in two tribal**  
2 **populations of Northeast India.**

3

4

5

6

7

8

9 **Authors: Joycy Vungneihchoi<sup>1</sup>□, M.P. Sachdeva<sup>1</sup>□**

10

11

12

13 **<sup>1</sup>Department of Anthropology, University of Delhi**

14

15

16 **Corresponding author**

17 E-mail: [joycyngaihte@gmail.com](mailto:joycyngaihte@gmail.com) (JV)

18

19

20

21 □These authors contributed equally to this work.

22

23 **Abstract:**

24 **Background:** Anemia is a deficiency of red blood cells and a public health burden in India. There  
25 needs to be more reporting of the prevalence of this condition in adults consisting of both males  
26 and females in a rural setting. Hence, this study is undertaken to address this gap.

27 **Materials and methods:** 1460 participants were recruited during a household survey in the  
28 Churachandpur district of Manipur. Data on personal, social demographic, and lifestyle variables  
29 were collected along with anthropometric measurements. Anemia status was tested with the help  
30 of a standardized portable hemoglobinometer.

31 **Results:** The prevalence of anemia was 42% and 46.4% among Kuki and Paite tribal communities  
32 of Manipur, respectively, which is significant within the communities. Type of occupation and  
33 lifestyle factors were also found to contribute to anemia. Age was also found to be inversely  
34 proportional to the prevalence of anemia.

35 **Conclusion:** The present study found a high prevalence of anemia and malnutrition, a matter of  
36 concern. The studied population, the tribals, are the deprived section of society that needs to be  
37 taken care of to achieve the United Nations Sustainable Developmental Goals (SDGs). They stay  
38 in remote areas which are not easily accessible, and hence they should be prioritized in terms of  
39 health and various other developments. Also, this high prevalence of anemia can lead to various  
40 health complications like cardiovascular diseases if not treated. Iron supplements should act as an  
41 intervention for the high prevalence of anemia and should be delivered timely to vulnerable  
42 populations.

43 **Keywords:** Anemia, prevalence, tribal health, burden, Northeast India

44 **Introduction:**

45 According to the World Health Organization (WHO), anemia is a grave worldwide health problem  
46 and can be defined as a low hemoglobin concentration. It is a good indicator of reduced nutrient  
47 consumption and poor health, which can lead to stunting, wasting, reduced weight at birth, and  
48 increased weight during the lifetime as individuals constantly fatigue [1,2]. It is also known to  
49 cause mental problems, reduce immunity, and negatively impact the quality of life besides deficit  
50 oxygen supply to various body tissues [3]. There are different types of anemia; common causes  
51 could be nutrients, iron, folate, vitamin B12 and A, hemoglobinopathies, and diseases such as  
52 malaria, HIV, and tuberculosis [4].

53 Globally, anemia affects 1.76 billion people [5]. The current worldwide prevalence of anemia in  
54 2019 is 29.9% among women of reproductive age, 29.6% in non-pregnant, and 36.5% in pregnant  
55 women [6]. The region reported to have the second highest burden of anemia is South Asia, after  
56 Western Sub-Saharan Africa [7]. The total burden caused by anemia was calculated in 2019,  
57 resulting in 58.6 (40.14-81.1) million years of life with a disability [8]. Although the prevalence  
58 of anemia indicates a declining trend in 2019 (22.8%) compared to that in 1990 (27%), different  
59 regions still show an increasing trend.

60 The prevalence of anemia in India as per NFHS-5 (2019-21) was 57% among reproductive-age  
61 women, while it is 25% among men, which was higher than that of NFHS-4 reports [9]. In  
62 Manipur, NFHS-5 report states that the prevalence of anemia increased for non-pregnant women  
63 (26.4% to 29.3%) and decreased for men (9.5% to 6%) when compared to the NFHS-4 report [10].

64 Malnutrition is an abnormal consumption of nutrients where intake can be deprived or in excess  
65 leading to non-communicable disease [11]. Underweight and obese are the types of malnutrition  
66 considered in this study. Being Underweight can be defined as a low intake of nutrients, while  
67 obesity is the over-accumulation of fats. These abnormalities can act as a risk factor for non-

68 communicable diseases [12]. Globally, 1.9 billion adults are obese, and 462 million are  
69 underweight [6]. Such abnormality is a gray side among tribal populations, causing a risk of  
70 various cardiovascular diseases [13], and prevalence is high due to their traditional practice and  
71 low literacy [14]. In India, the prevalence of underweight men and women, as per NFHS-5 report  
72 is 16.2% and 18.7%, respectively, while that of overweight and obese are 22.9% and 24%,  
73 respectively [9]. As for Manipur's prevalence of underweight among men and women (age 15-49  
74 years) is 8% and 7.2%, respectively, showing a decreasing trend compared to the previous NFHS-4  
75 report [10]. There is a rapid increase in the prevalence of overweight men (30.3%) and women  
76 (34.1%) compared to the previous report, respectively [10].

77 According to the 2011 census, the tribal population in India consists of 8.6% of the total  
78 population, while in Manipur, 41% of the population belongs to tribals. The word "Tribal" is self-  
79 explanatory because they are deprived of health facilities, education, sanitation, and basic  
80 amenities[15]. Although different tribal communities in India are diversified, they still share a  
81 common burden of morbidity and mortality [16]. Various studies have been done, yet studies  
82 among tribal populations are scarce. Tribals are endogamous populations. Studies of anemia on  
83 tribals are vital as they are listed among vulnerable groups, have different cultures and beliefs, and  
84 illiteracy and isolation from non-tribal inhabitants expose them to different health and social issues  
85 [17]. Several studies on children and women have been done on anemia, yet, there is a research  
86 gap in reporting the same for males. Furthermore, most researches deal with urban populations.  
87 Hence, the present paper focuses on reporting the prevalence of anemia alongside analyzing the  
88 double burden of malnutrition in both males and females of rural settings among two different  
89 tribal communities of Manipur.

90 **Materials and methods:**

91 **Study area and people-**

92 The study area is a hilly area covered with forest where tribals reside. There are 33 recognized  
93 tribal communities of Manipur, and they are broadly divided into two categories – Kuki-Chin-  
94 Mizo and Naga. The present study focuses on two tribal communities, Kukis and Paites, that fall  
95 under the Kuki-Chin-Mizo group. The Paites in the present study settled in the higher altitude areas  
96 of Churachandpur, while the Kukis reside comparatively in the lower altitude region and closer to  
97 the heart of the district. The two studied tribal communities mainly depend on jhum cultivation,  
98 and rice is their staple food. Yet, a gradual transition in the lifestyle of tribals was observed in  
99 terms of occupation, dietary habits, and other lifestyles. Cultivators started shifting to rearing  
100 animals and business and took a keen interest in education. Dietary habits were also drastically  
101 changed, accompanied by a sedentary lifestyle.

102 Basic amenities such as water for drinking and household usage are stored in a common water  
103 storage tank in each village which is carried in pots to their own houses. Irregular electric supply  
104 to rural areas is prominent and poorly affected by the weather. Generally, as per works of literature,  
105 the consumption of alcohol and tobacco products is high.

106 **Study design and recruitment of participants**

107 The present cross-sectional study was conducted among two tribal communities of Manipur. A  
108 total of 40 villages were picked randomly, and a house-to-house survey was carried out. Pre-  
109 informed written consent was taken from the study participants before recruitment. Ethical  
110 clearance was obtained from the Institutional Ethics Committee, Department of Anthropology,  
111 University of Delhi. The two tribal communities were selected based on the highest tribe  
112 proportion, namely Kuki (24.6%) and Paite (6.6%) from two blocks of Churachandpur district,  
113 Manipur.

114 The sample size was calculated using an online sample size calculator called ‘Sampsize.’ A  
115 reported prevalence of 38% [18] was used, an error is 5%, and 95% Confidence Interval was used,  
116 which give a sample size result of 362. The number was doubled (approximately) that is, 730  
117 participants in each community as two communities were to be compared in the present study.  
118 Individuals of either sex in the age group of 30-65 years were recruited from Kuki (N=730) and  
119 Paite (N=730) communities of Churachandpur district, Manipur. Both the studied tribal  
120 communities come under Kuki-Chin-Mizo and share numerous similarities-speaks Tibeto-Burman  
121 languages, which could be understandable to each other. They originated from Tibet or China via  
122 Burma, as per several published records [19]. The geographical location of the Paites is situated in  
123 higher altitudes when compared to that of Kuki in the study. Individuals who underwent any major  
124 surgery in the recent past, recent blood donation, or any pregnant or lactating women or those  
125 suffering from any chronic illness or deformities were excluded from the study.

#### 126 **Data collection**

127 Data on personal identifiers (name, age, sex) and socio-demography (education, occupation,  
128 monthly income) were collected from each participant using interview schedules.

129 Anthropometric measurements are taken following standard procedures [20].

130 Height- Standing height was measured using a movable anthropometer. The measurement was  
131 done from the vertex (highest point on the head) to the floor.

132 Weight- It was measured using the digital weighing machine.

133 Body mass index (BMI) was calculated using weight in kilograms divided by height in meter  
134 square.

135 The concentration of blood hemoglobin (Hb) was measured using an automated AccuSure  
136 Hemoglobinometer (HB-101) to measure hemoglobin for anemia status. Capillary blood was

137 collected using a sterile lancet from the participant's fingertip, the first drop was removed, and the  
138 second blood was transferred to the strips set on the device.

### 139 **Standard cut-offs**

140 The standardized cut-offs for anemia used are as follows: Males- Normal ( $\geq 13$  g/dL), Mild (11-  
141 12.9 g/dL), Moderate (8.0-10.9 g/dL), severe ( $< 8.0$  g/dL). Females- Normal ( $\geq 12$  g/dL), Mild (11-  
142 11.9 g/dL), Moderate (8.0-10.9 g/dL), severe ( $< 8.0$  g/dL). In the present study, the number of  
143 participants in moderate and severe anemia was low. Hence, these two categories were combined  
144 and considered together during analysis [21].

145 BMI standard cut-offs used as follows: Underweight ( $< 18.5$  kg/m<sup>2</sup>), Normal (18.5-22.9 kg/m<sup>2</sup>),  
146 Overweight (23.0-24.9 kg/m<sup>2</sup>), and Obese ( $\geq 25.0$  kg/m<sup>2</sup>) [22].

### 147 **Data analysis**

148 All data were analyzed using SPSS version 22. Tests of normality were done for all the studied  
149 variables. The median and the Interquartile range (IQR) were used when the data were not  
150 normally distributed. Mann-Whitney U test was used to see the difference in median values.  
151 Categorical variables were reported as numbers (percentages). The Chi-square test was used to  
152 identify differences in categorical variables. The analysis used in this study is frequency  
153 distribution to study the prevalence of anemia (total and sex-wise) and among sociodemographic  
154 and lifestyle variables. Binary logistic regression was used to estimate the risk of variables for the  
155 outcomes.  $p < 0.05$  was considered statistically significant.

### 156 **Results:**

157 The median age of the studied Kuki community was 41.0 (IQR:31.0-54.0) years, whereas, among  
158 the Paite community, it was 46.5 (IQR: 34.0-57.0) years. The prevalence of anemia was 42% and  
159 46.4% among Kuki and Paite tribal communities of Manipur, respectively but not statistically

160 significant between the communities. Mild anemia was significantly higher among males in both  
 161 Kuki (29%) and Paite (35%), whereas moderate/severe anemia was found to be significantly  
 162 higher among females (21.8% and 22.7%) in both tribal communities. The difference in the  
 163 prevalence of anemia between males and females in both tribal communities was found to be  
 164 statistically significant ( $p < 0.001$ ) but not statistically significant when compared between the two  
 165 communities (Table 1).

166 Table 1: Prevalence of anemia among the two studied tribal communities of Manipur.

| Variable | Parameters          | Kuki Community |                |                |                  | Paite Community |                |                |                  | $\chi^2$ p-value   |
|----------|---------------------|----------------|----------------|----------------|------------------|-----------------|----------------|----------------|------------------|--------------------|
|          |                     | Total, N (%)   | Males, N (%)   | Females, N (%) | $\chi^2$ p-value | Total, N (%)    | Males, N (%)   | Females, N (%) | $\chi^2$ p-value |                    |
| Anemia   | Normal              | 423<br>(57.9)  | 200<br>(60.4)  | 223<br>(55.9)  | <0.001*          | 391<br>(53.6)   | 183<br>(54.8)  | 208 (52.5)     | <0.001*          | 0.172 <sup>ψ</sup> |
|          | Mild                | 185<br>(25.3)  | 96<br>(29.0)   | 89<br>(22.3)   |                  | 215<br>(29.5)   | 117<br>(35.0)  | 98 (24.7)      |                  | 0.243 <sup>¥</sup> |
|          | Moderate/<br>Severe | 122<br>(16.7)  | 35<br>(10.6)   | 87<br>(21.8)   |                  | 124<br>(16.9)   | 34<br>(10.2)   | 90 (22.7)      |                  | 0.608 <sup>€</sup> |
| Total    |                     | 730<br>(100.0) | 331<br>(100.0) | 399<br>(100.0) |                  | 730<br>(100.0)  | 334<br>(100.0) | 396<br>(100.0) |                  |                    |

167 \*Significant at  $p < 0.05$ ; N= Counts; <sup>ψ</sup>: Chi-square between overall participants of Kuki and Paite communities; <sup>¥</sup>: Chi-square  
 168 between males of both communities; <sup>€</sup>: Chi-square between females of both communities.

169 The median age concerning anemia was significantly lower in Kuki community than Paite  
 170 community. In the Kuki community, agriculturist is significantly high among normal and mild  
 171 anemia, while the homemakers are significantly high in moderate/severe anemia. While in Paite  
 172 community, agriculturist is significantly high in all categories of anemia. In the studied  
 173 communities, non-drinkers are significantly high among normal, mild, and moderate/severe  
 174 anemia (Table 2).



175 Table 2: Distribution of socio-demographic and lifestyle variables with respect to anemia among  
 176 the two studied tribal communities.

| Variables         | Parameters                  | Kuki Community          |                         |                               |         | Paite Community         |                         |                               |         |
|-------------------|-----------------------------|-------------------------|-------------------------|-------------------------------|---------|-------------------------|-------------------------|-------------------------------|---------|
|                   |                             | Normal,<br>N (%)        | Mild,<br>N (%)          | Moderate/<br>Severe,<br>N (%) | p-value | Normal,<br>N (%)        | Mild,<br>N (%)          | Moderate/<br>Severe,<br>N (%) | p-value |
| Age               | Median (IQR)                | 40.0<br>(31.0-<br>51.0) | 43.0<br>(31.5-<br>56.0) | 43 (31.0-<br>60.0)            | 0.035*  | 46.0<br>(33.0-<br>56.0) | 47.0<br>(35.0-<br>58.0) | 49.0<br>(33.0-<br>60.0)       | 0.129   |
| Marital<br>status | Not married                 | 23 (5.4)                | 7<br>(3.8)              | 4 (3.3)                       | 0.559   | 14 (3.6)                | 7<br>(3.3)              | 3 (2.4)                       | 0.832   |
|                   | Married                     | 321<br>(75.9)           | 144<br>(77.8)           | 89 (73.0)                     |         | 318<br>(81.3)           | 170<br>(79.1)           | 98 (79.0)                     |         |
|                   | Divorced/<br>widowed (er)   | 79<br>(18.7)            | 34<br>(18.4)            | 29 (23.8)                     |         | 59<br>(15.1)            | 38<br>(17.7)            | 23 (18.5)                     |         |
| Occupation        | Unemployed                  | 56<br>(13.2)            | 42<br>(22.7)            | 31 (25.4)                     | <0.001* | 63<br>(16.1)            | 47<br>(21.9)            | 25 (20.2)                     | 0.014*  |
|                   | Agriculture                 | 142<br>(33.6)           | 57<br>(30.8)            | 34 (27.9)                     |         | 177<br>(45.3)           | 105<br>(48.8)           | 66 (53.2)                     |         |
|                   | Self/government<br>employed | 129<br>(30.5)           | 48<br>(25.9)            | 19 (15.6)                     |         | 100<br>(25.6)           | 46<br>(21.4)            | 15 (12.1)                     |         |
|                   | Home maker                  | 96<br>(22.7)            | 38<br>(20.5)            | 38 (31.1)                     |         | 51<br>(13.0)            | 17<br>(7.9)             | 18 (14.5)                     |         |
| Monthly<br>income | ≤10,000                     | 271<br>(64.1)           | 117<br>(63.2)           | 76 (62.3)                     | 0.194   | 307<br>(78.5)           | 174<br>(80.9)           | 108 (87.1)                    | 0.152   |
|                   | 10,001-20,000               | 131<br>(31.0)           | 61<br>(33.0)            | 34 (27.9)                     |         | 73<br>(18.7)            | 34<br>(15.8)            | 16 (12.9)                     |         |
|                   | ≥20,001                     | 21 (5.0)                | 7<br>(3.8)              | 12 (9.8)                      |         | 11 (2.8)                | 7<br>(3.3)              | 0 (0.0)                       |         |

|                   |                   |               |               |           |        |               |               |           |        |
|-------------------|-------------------|---------------|---------------|-----------|--------|---------------|---------------|-----------|--------|
| Alcohol           | Non drinker       | 260<br>(61.5) | 106<br>(57.3) | 92 (75.4) | 0.009* | 269<br>(68.8) | 131<br>(60.9) | 97 (78.2) | 0.001* |
|                   | Current drinker   | 140<br>(33.1) | 62<br>(33.5)  | 26 (21.3) |        | 96<br>(24.6)  | 57<br>(26.5)  | 14 (11.3) |        |
|                   | Ex drinker        | 23 (5.4)      | 17<br>(9.2)   | 4 (3.3)   |        | 26 (6.6)      | 27<br>(12.6)  | 13 (10.5) |        |
| Tobacco consumers | Non consumers     | 131<br>(31.0) | 48<br>(25.9)  | 34 (27.9) | 0.429  | 86<br>(22.0)  | 43<br>(20.0)  | 25 (20.2) | 0.815  |
|                   | Smoking/Smokeless | 292<br>(69.0) | 137<br>(74.1) | 88 (72.1) |        | 305<br>(78.0) | 172<br>(80.0) | 99 (79.8) |        |
| Smoking status    | No                | 289<br>(68.3) | 124<br>(67.0) | 90 (73.8) | 0.780  | 169<br>(43.2) | 69<br>(32.1)  | 48 (38.7) | 0.053  |
|                   | Yes               | 131<br>(31.0) | 61<br>(33.0)  | 32 (26.2) |        | 206<br>(52.7) | 130<br>(60.5) | 71 (57.3) |        |
|                   | Ex-smoker         | 3 (0.7)       | 0<br>(0.0)    | 0 (0.0)   |        | 16 (4.1)      | 16<br>(7.4)   | 5 (4.0)   |        |
| Beedis per day    | ≤10 beedis        | 84<br>(64.1)  | 32<br>(52.5)  | 22 (68.8) | 0.202  | 137<br>(66.5) | 89<br>(68.5)  | 56 (78.9) | 0.145  |
|                   | ≥11 beedis        | 47<br>(35.9)  | 29<br>(47.5)  | 10 (31.3) |        | 69<br>(33.5)  | 41<br>(31.5)  | 15 (21.1) |        |

177 \*Significant at  $p < 0.05$ ;  $N =$  Counts; Confounders controlled for Kuki communities are age, sex, occupation and alcohol while sex,  
 178 occupation, alcohol are controlled for Paites.

179 In Kuki community, underweight participants have a 1.79- and 1.02-folds increased risk of having  
 180 mild and moderate/severe anemia, respectively, whereas, among Paites, underweight individuals  
 181 have a 1.65- and 2.19-folds increased risk of having mild and moderate/severe anemia. It is  
 182 significant only for moderate/severe anemia among the Paites. In the case of overweight/obese  
 183 individuals, Kuki participants have 0.72- and 0.52- reduced risks of having mild and  
 184 moderate/severe anemia; while Paite participants have 0.98- and 0.61- reduced risks of having

185 mild and moderate/severe anemia. It is significant for moderate/severe in both communities (Table  
186 3).

187 Table 3: Binary logistic regression of BMI with respect to anemia after controlling for  
188 confounders.

| Adiposity indicator | Parameters       | Kuki community   |         |                        |         | Paite community  |         |                        |         |
|---------------------|------------------|------------------|---------|------------------------|---------|------------------|---------|------------------------|---------|
|                     |                  | Mild anemia      |         | Moderate/Severe anemia |         | Mild anemia      |         | Moderate/Severe anemia |         |
|                     |                  | OR (95% CI)      | p-value | OR (95% CI)            | p-value | OR (95% CI)      | p-value | OR (95% CI)            | p-value |
| BMI                 | Underweight      | 1.79 (0.71-4.51) | 0.216   | 1.02 (0.40-2.61)       | 0.969   | 1.65 (0.81-3.33) | 0.167   | 2.19 (1.00-4.79)       | 0.049*  |
|                     | Overweight/Obese | 0.72 (0.50-1.06) | 0.093   | 0.52 (0.34-0.81)       | 0.004*  | 0.98 (0.68-1.42) | 0.918   | 0.61 (0.38-0.98)       | 0.039*  |

189 \*Significant at  $p < 0.05$ . Confounders controlled for Kuki communities are age, sex, occupation and alcohol while sex, occupation,  
190 alcohol are controlled for Paites.

191 Among the Kuki community, mild anemia trend alongside age tends to show a reverse trend after  
192 50 years. Females in the younger age group (30-39 years) tend to show a high prevalence of anemia  
193 which decreases with age. While males, on the other hand, show a high prevalence after 50 years.  
194 Whereas among the Paites, females tend to have a high prevalence at an early age, gradually  
195 decreasing with age and increasing after 50 years. For males, age is directly proportional to the  
196 prevalence of anemia (Fig 1).

197 In the Kuki and Paite communities, the prevalence of moderate/severe anemia is higher among the  
198 younger age group (30-39 years), which gradually decreases as the age progresses (40-49 years),

199 after which an increase in the prevalence is seen from 50 years and above. The trend is similar in  
200 both males and females. The prevalence of anemia is highest among the female younger age group  
201 and the lowest as age increases. However, in the case of males, the prevalence of anemia increased  
202 with age (Fig 2).

203 A relationship between underweight, overweight/obese individuals, and anemia was studied with  
204 age. It was seen that underweight increases with age while overweight/obese decreases with age  
205 in both communities. The prevalence of anemia decreases with age in both the studied  
206 communities (Fig 3).

207 In the Kuki and Paite communities, the declining trend was observed in overweight/obesity and  
208 moderate/severe anemia with age, while underweight increased as age progressed (Fig 4).

## 209 **Discussions:**

210 The prevalence of both mild and moderate/severe anemia has been observed for both the tribal  
211 communities-Kuki and Paite. The prevalence is higher for Paite community when compared to  
212 Kuki community. This might be due to several factors, including nutrition and physical activity  
213 [23]. There is an alarming prevalence of underweight among Paites and obesity among Kukis,  
214 which need immediate public health interventions. The present study shows that underweight  
215 individuals have a significantly higher risk of having anemia ( $p=0.049$ ) in the case of Paite while  
216 among Kukis, there is a high risk but not significant ( $p=0.069$ ). This result is supported by [24]  
217 who reported that underweight individuals are likely to be anemic. The present study shows that  
218 being overweight or obese masked the risk of becoming anemic. This is also supported by [25]  
219 who reported that an individual who is obese masked off the odds of being anemic.

220 It was reported that the type of food one consumes also indicates the community [26]. The present  
221 study reported a meat consumption disparity between the two tribes, where the frequency of meat

222 consumption is comparatively higher among the Kukis than Paites. Less meat consumption was  
223 reported to have a high risk of iron deficiency leading to anemia and vice-versa [27]. Paites have  
224 comparatively less meat consumption may be due to the non-availability of meat in markets due  
225 to transportation issues, as the studied villages are far away from the heart of the district. The actual  
226 scenario is that there is no market; only small shops with limited items can be seen.

227 Several studies reported that vegetarians, compared to non-vegetarians, have lower hemoglobin  
228 counts, which might cause anemia [28, 29]. Also, an essential component of animal food known  
229 as Vitamin B-12 plays a vital role in various cellular processes [30] and is abundant in the non-  
230 vegetarian diet but lacking in the vegetarian diet. The studies above show that less or no meat  
231 consumption, as in the present study case, the Paites, can be more anemic than Kukis.

232 The present study shows that about 40% of women in both communities are anemic, similar to  
233 earlier studies done by [31, 32]. Women were seen to be prioritizing the health of their families  
234 first over themselves, which is reported in several studies [33]. Women are an integral part of the  
235 family; in most cases, they are solely responsible for preparing food and serving it to families.  
236 Women were reported to dine last after their whole family and consume the few leftovers [33].  
237 This might be why females show a high prevalence of anemia due to nutrient deficiency. Also,  
238 most women in the present study were found to have high parity, and [5] found that women with  
239 high parity have an increased risk for anemia.

240 Also, anemia shows a declining trend as age progresses in the present study. This might be because  
241 women lose heavy blood during the menstrual cycle and childbirth, and have low hemoglobin  
242 values during pregnancy [34], thereby causing a high prevalence of anemia [35, 36]. Such anemia  
243 arises from iron deficiency, which can be prevented via iron supplements and diets. WHO

244 recommends iron supplements for adolescents and adult women, 30-60 mg of elemental iron to be  
245 taken daily for three consecutive months per year [37]. Yet, in the older age group, a natural  
246 phenomenon called menopause occurs when women no longer shed blood; hence the prevalence  
247 of anemia is low.

248 This study also shows that Paites have a high rate of illiteracy when compared to Kukis and are  
249 more anemic. This is in line with a study done in Ethiopia, stating that education bridged the gap  
250 between knowledge, health, and nutrition [38]. The monthly incomes of Paites are comparatively  
251 lower than Kukis, and Paites are more anemic in the present study. This study shows a similar  
252 trend to other studies [39]. Women's economic status and anemia [40, 41] were also reported to  
253 have an association that supports the present study. A study done among Bangladeshi women  
254 found that rural women were more anemic than urban women [36].

255 It has been reported that smoking and consumption of tobacco products increase the risk of anemia  
256 [42-44]. Their results were similar to the present study as it observed high alcohol and tobacco  
257 consumption among the studied population. The present study noted that alcohol consumption is  
258 higher in Kukis when compared to Paites. The reason comes back to the availability and  
259 transportation for the Paites. An additional reason might be because several organizations regularly  
260 joined hands to conduct alcohol/tobacco-free-drive in localities to prevent the suppliers and  
261 consumers. Smoking of local beedis is comparatively higher among Paites than Kukis. This might  
262 be because the Paites are primarily cultivators, and the smoke from beedis acts as mosquito and  
263 insect repellent. They are being rolled by the wife or female member of the family for their  
264 husband, parents, or siblings, and themselves.

265 **Conclusions:**

266 The high prevalence of anemia, underweight, and overweight/obese individuals in this paper need  
267 urgent attention. The present study and existing literature support that anemia is a risk factor for  
268 various health complications like cardiovascular diseases (CVDs). Therefore, policymakers must  
269 immediately address this issue among the tribal communities. The lack of proper health  
270 infrastructure, medical teams, and health policies cause the public to suffer from malnutrition and  
271 other diseases. Participants in the present study are tribals- the deprived groups with low literacy  
272 rates, high consumers of alcohol and tobacco products, low consumers of nutritious diet and milk,  
273 and no proper iron supplementation. The studied tribal communities do not prioritize health much,  
274 and several participants never visited a hospital or clinic for a health check-up. Such is the level of  
275 ignorance in the communities. To tackle this, more numbers of health institutions with adequate  
276 medical staff in rural areas with a minimal charge for a check-up is mandatory and proper  
277 functioning should be regularly checked. Proper iron supplementation should be considered as an  
278 intervention, as the prevalence of anemia is  $\geq 40\%$  among women in the present study. There  
279 should be no/minimal cost for these supplements, and they should reach out to vulnerable  
280 populations regularly. Other programs like health awareness programs, literacy programs, and free  
281 medical camps should be undertaken. Genetics and biochemical studies should be incorporated  
282 into future studies to understand the cause of anemia and suggest appropriate interventions in these  
283 rural settings.

#### 284 **Data availability**

285 The raw data supporting the conclusions of this article will be made available by the authors  
286 without undue reservation.

#### 287 **Ethics statement**

288 The study involving human participants was reviewed and approved by the Ethical Committee of  
289 the Department of Anthropology (ref.no.Anth/2022-23/533), University of Delhi.

### 290 **Conflict of interest**

291 The authors declared that the research was conducted without any commercial or financial  
292 relationships that could be construed as a potential conflict of interest.

### 293 **Author contribution**

294 JV and MPS designed and executed the study. JV conceptualized the manuscript. JV executed the  
295 statistical analyses and wrote the first draft of the manuscript. MPS reviewed and critiqued the  
296 statistical analyses and first draft. MPS and JV thoroughly reviewed the final version of the  
297 manuscript. All authors contributed to the article and approved the submitted version.

### 298 **Funding**

299 This research received no specific grant from any funding agency in the public, commercial, or  
300 not-for-profit sectors.

### 301 **Acknowledgment**

302 The authors would like to thank all the participants for their time and participation in this study.

303

304

305

306

307

308



## 309 **References:**

- 310 1. Thakur N, Chandra J, Pemde H, Singh V. Anemia in severe acute malnutrition. *Nutrition*.  
311 2014 Apr 1;30(4):440-2.
- 312 2. Gil JD, Reidsma P, Giller K, Todman L, Whitmore A, van Ittersum M. Sustainable  
313 development goal 2: Improved targets and indicators for agriculture and food security.  
314 *Ambio*. 2019 Jul;48(7):685-98.
- 315 3. Arabyat R, Arabyat G, Al-Taani G. Prevalence and risk factors of anaemia among ever-  
316 married women in Jordan. *Eastern Mediterranean Health Journal*. 2019 Aug 1;25(8).
- 317 4. Chaparro CM, Suchdev PS. Anemia epidemiology, pathophysiology, and etiology in  
318 low-and middle-income countries. *Annals of the new York Academy of Sciences*. 2019  
319 Aug;1450(1):15-31.
- 320 5. Owais A, Merritt C, Lee C, Bhutta ZA. Anemia among Women of Reproductive Age: An  
321 Overview of Global Burden, Trends, Determinants, and Drivers of Progress in Low-and  
322 Middle-Income Countries. *Nutrients*. 2021 Aug 10;13(8):2745.
- 323 6. World Health Organization. Anaemia in women and children. 2021. Accessed on 23  
324 January 2023,  
325 [https://www.who.int/data/gho/data/themes/topics/anaemia\\_in\\_women\\_and\\_children](https://www.who.int/data/gho/data/themes/topics/anaemia_in_women_and_children)
- 326 7. Kassebaum NJ, Jasrasaria R, Naghavi M, Wulf SK, Johns N, Lozano R, Regan M,  
327 Weatherall D, Chou DP, Eisele TP, Flaxman SR. A systematic analysis of global anemia  
328 burden from 1990 to 2010. *Blood, the Journal of the American Society of Hematology*.  
329 2014 Jan 30;123(5):615-24.

- 330 8. Gardner W, Kassebaum N. Global, regional, and national prevalence of anemia and its  
331 causes in 204 countries and territories, 1990–2019. *Current Developments in Nutrition*.  
332 2020 Jun;4(Supplement\_2):830-.
- 333 9. National Family Health Survey-5. India fact sheet. 2019-20. Key findings accessed on 15  
334 December 2022, < [http://rchiips.org/nfhs/NFHS-5\\_FCTS/India.pdf](http://rchiips.org/nfhs/NFHS-5_FCTS/India.pdf)>
- 335 10. National Family Health Survey-5. State fact sheet. 2019-20. Key findings accessed on 15  
336 December 2022, < [http://rchiips.org/nfhs/NFHS-5\\_FCTS/Manipur.pdf](http://rchiips.org/nfhs/NFHS-5_FCTS/Manipur.pdf)>
- 337 11. World Health Organization. Obesity. 2023. Accessed on 23 January 2023, <  
338 [https://www.who.int/health-topics/obesity/#tab=tab\\_1](https://www.who.int/health-topics/obesity/#tab=tab_1)>
- 339 12. Li X, Niu H, Bai X, Wang Y, Wang W. Association of Obesity and Hypertension: A Cohort  
340 Study in China. *International Journal of Hypertension*. 2021 Dec 10;2021.
- 341 13. Kshatriya GK, Acharya SK. Triple burden of obesity, undernutrition, and cardiovascular  
342 disease risk among Indian tribes. *PloS one*. 2016 Jan 25;11(1):e0147934.
- 343 14. Kapoor AK, Dhall M. Poverty, malnutrition and biological dynamics among tribes of India.  
344 *Health Science Journal*. 2016;10(3):0-.
- 345 15. Saha UC, Saha KB. Health Care for India's remote Tribes. *Kurukshetra: A Journal on Rural*  
346 *Development*. 2018;67(1):27-30.
- 347 16. Negi DP, Singh MM. Tribal health in India: a need for a comprehensive health policy. *Int*  
348 *J Health Sci Res*. 2019;9(3):299-305.
- 349 17. Mahanta TG, Mahanta BN, Gogoi P, Dixit P, Joshi V. Anaemia, its determinants and effect  
350 of different interventions amongst tea tribe adolescent girls living in Dibrugarh district of  
351 Assam. *Indian Journal of Community Health*. 2014 Dec 31;26(Supp 2):300-9.

- 352 18. Tungdim MG, Ginzaniang T, Kabui GP, Verma D, Kapoor S. Risk of cardiovascular  
353 disease among diabetic patients in Manipur, Northeast India. *Journal of Anthropology*.  
354 2014;2014.
- 355 19. Nemching GD. Marriage, family, and kinship among the paite tribe of manipur. Concept  
356 Publishing Company; 2008.
- 357 20. Singh IP, Bhasin MK. A manual of biological anthropology. Kamla Raj Enterprises; 2004.
- 358 21. World Health Organization. Haemoglobin concentrations for the diagnosis of anaemia and  
359 assessment of severity. World Health Organization; 2011.
- 360 22. Consultation WE. Appropriate body-mass index for Asian populations and its implications  
361 for policy and intervention strategies. *Lancet* (London, England). 2004 Jan  
362 10;363(9403):157-63.
- 363 23. Popkin BM. Global nutrition dynamics: the world is shifting rapidly toward a diet linked  
364 with noncommunicable diseases-. *The American journal of clinical nutrition*. 2006 Aug  
365 1;84(2):289-98.
- 366 24. Gopinath A, Ashok N, Kulkarni P, Manjunath R. Prevalence and factors influencing  
367 anaemia among pregnant women in rural Mysuru, India. *Int. J. Community Med. Public*  
368 *Heal.*. 2016 Apr;3:4.
- 369 25. Gona PN, Gona CM, Chikwasha V, Haruzivishe C, Mapoma CC, Rao SR. Intersection of  
370 HIV and Anemia in women of reproductive age: A 10-year analysis of three Zimbabwe  
371 demographic health surveys, 2005–2015. *BMC Public Health*. 2021 Dec;21(1):1-7.
- 372 26. Monsang ES, Namita Singh S. Prevalence of Anaemia and Nutritional Knowledge among  
373 Tribal Women of Reproductive Age Group of Meghalaya. India *Int. J. Curr. Microbiol.*  
374 *App. Sci.* 2018;7(10):1221-9.

- 375 27. Gibson S, Ashwell M. The association between red and processed meat consumption and  
376 iron intakes and status among British adults. *Public health nutrition*. 2003 Jun;6(4):341-50.
- 377 28. Li D, Sinclair AJ, Mann NJ, Turner A, Ball MJ. Selected micronutrient intake and status  
378 in men with differing meat intakes, vegetarians and vegans. *Asia Pacific Journal of Clinical*  
379 *Nutrition*. 2000 Mar 27;9(1):18-23.
- 380 29. Elorinne AL, Alfthan G, Erlund I, Kivimäki H, Paju A, Salminen I, Turpeinen U,  
381 Voutilainen S, Laakso J. Food and nutrient intake and nutritional status of Finnish vegans  
382 and non-vegetarians. *PloS one*. 2016 Feb 3;11(2):e0148235.
- 383 30. Koury MJ, Ponka P. New insights into erythropoiesis: the roles. *Annu. Rev. Nutr.*  
384 2004;24:105-31.
- 385 31. Bora G, Barman S, Barman J. Maternal anaemia: A prevailing burden in Assam, India.  
386 *IOSR Journal of Dental and Medical Sciences*. 2015;14(3):42-7.
- 387 32. Mahanta TG, Mahanta BN, Gogoi P, Dixit P, Joshi V, Ghosh S. Prevalence and  
388 determinants of anaemia and effect of different interventions amongst tea tribe adolescent  
389 girls living in Dibrugarh district of Assam. *Clinical Epidemiology and Global Health*. 2015  
390 Aug 1;3(2):85-93.
- 391 33. Sedlander E, Talegawkar S, Ganjoo R, Ladwa C, DiPietro L, Aluc A, Rimal RN. How  
392 gender norms affect anemia in select villages in rural Odisha, India: A qualitative study.  
393 *Nutrition*. 2021 Jun 1;86:111159.
- 394 34. Kanu FA. Anemia among pregnant women participating in the Special Supplemental  
395 Nutrition Program for Women, Infants, and Children—United States, 2008–2018.  
396 *MMWR. Morbidity and mortality weekly report*. 2022;71.

- 397 35. Mirza FG, Abdul-Kadir R, Breymann C, Fraser IS, Taher A. Impact and management of  
398 iron deficiency and iron deficiency anemia in women's health. Expert review of  
399 hematology. 2018 Sep 2;11(9):727-36.
- 400 36. Ara G, Khanam M, Rahman AS, Islam Z, Farhad S, Sanin KI, Khan SS, Rahman MM,  
401 Majoor H, Ahmed T. Effectiveness of micronutrient-fortified rice consumption on anaemia  
402 and zinc status among vulnerable women in Bangladesh. PloS one. 2019 Jan  
403 10;14(1):e0210501.
- 404 37. World Health Organization. Daily iron supplementation in adult women and adolescent  
405 girls. 2016. Retrieved on 23 January 2023. <  
406 [https://apps.who.int/iris/bitstream/handle/10665/204761/9789241510196\\_eng.pdf](https://apps.who.int/iris/bitstream/handle/10665/204761/9789241510196_eng.pdf)>
- 407 38. Asres Y, Yemane T, Gedefaw L. Determinant factors of anemia among nonpregnant  
408 women of childbearing age in southwest Ethiopia: a community based study. International  
409 scholarly research notices. 2014;2014.
- 410 39. Rokade, S., Mog, M., & Mondal, N. A. (2020). Nutritional status among tribal women in  
411 Maharashtra, India: Spatial variations and determinants. *Clinical Epidemiology and Global*  
412 *Health*, 8(4), 1360-1365.
- 413 40. Agarwal S, Sethi V. Nutritional disparities among women in urban India. Journal of health,  
414 population, and nutrition. 2013 Dec;31(4):531.
- 415 41. Biswas M, Baruah R. Maternal anaemia associated with socio-demographic factors among  
416 pregnant women of Boko-Bongaon Block Kamrup, Assam. Indian Journal of Basic and  
417 Applied Medical Research. 2014 Mar;3(2):712-21.

- 418 42. Kalburgi NB, Koregol AC, Muley A, Warad S, Patil S. Anemia of chronic disease,  
419 periodontal disease and tobacco use: an association based on hematological parameters.  
420 International Journal of Oral & Maxillofacial Pathology. 2013 Apr 1;4(2):18-24.
- 421 43. Singh RK. Lifestyle behavior affecting prevalence of anemia among women in EAG states,  
422 India. Journal of Public Health. 2013 Jun;21(3):279-88.
- 423 44. Vivek A, Kaushik RM, Kaushik R. Tobacco smoking-related risk for iron deficiency  
424 anemia: A case-control study. Journal of Addictive Diseases. 2022 May 22:1-9.

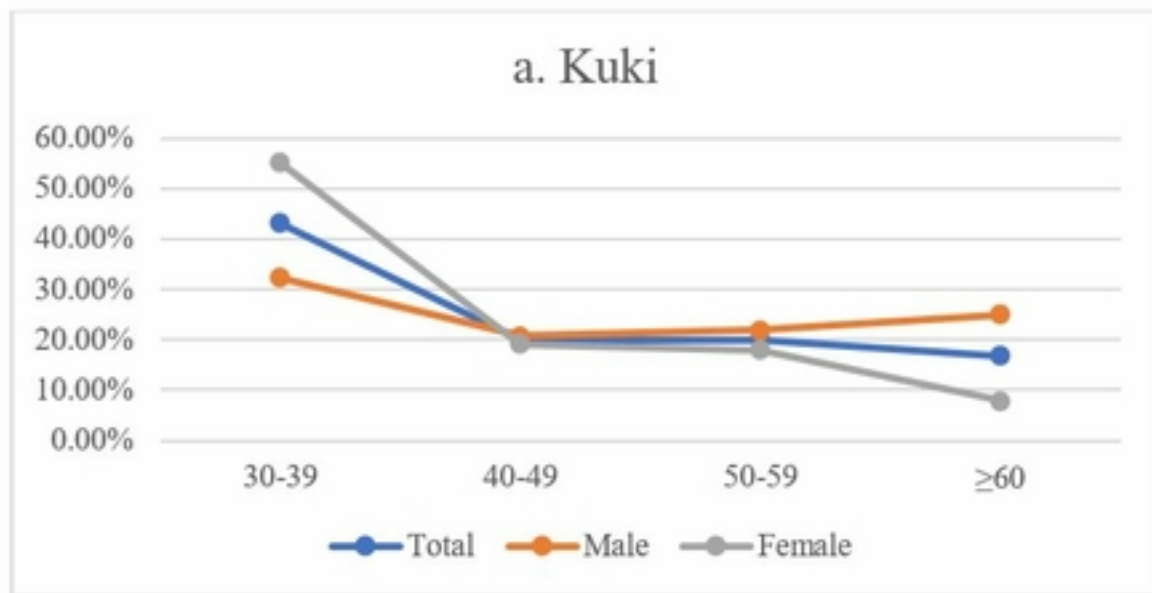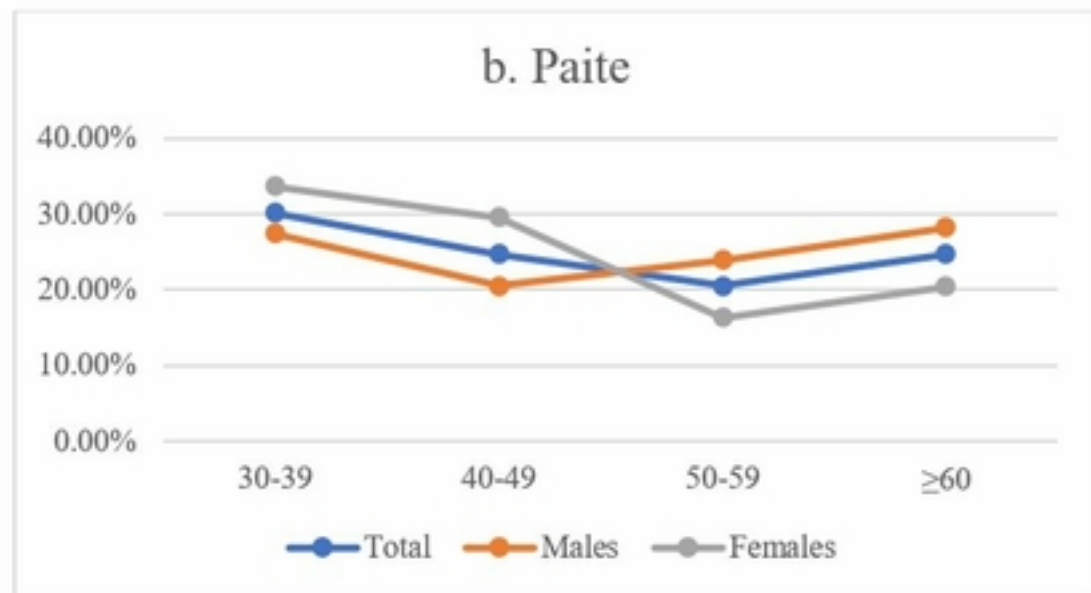

Figure 1: a). Distribution of age cohort (10 years) with mild anemia among Kuki community. b). Distribution of age cohort (10 years) with mild anemia among Paite community.

Figure

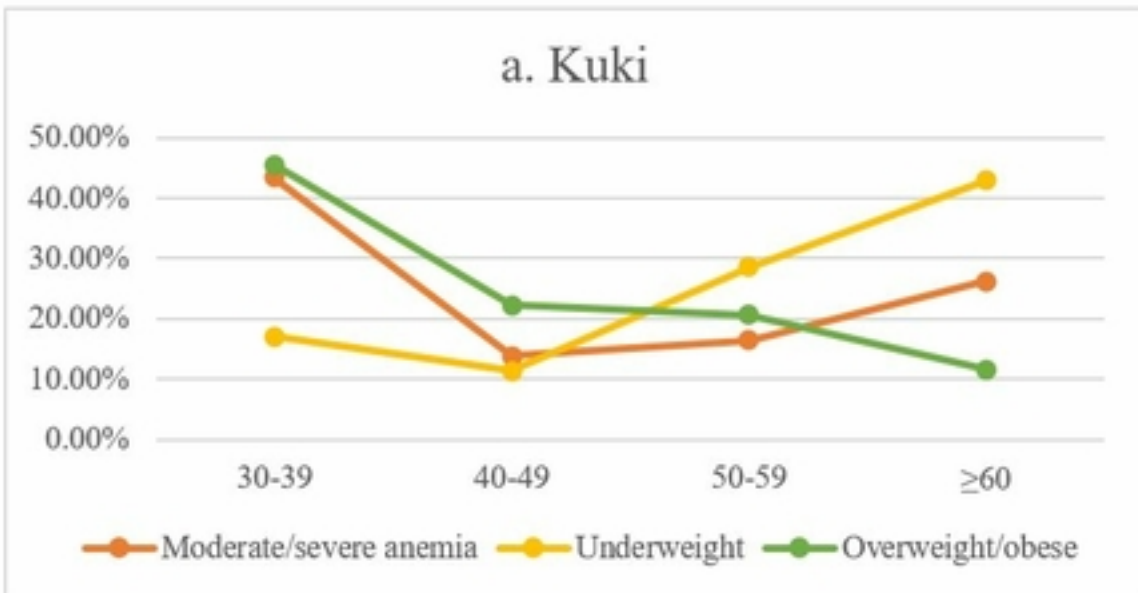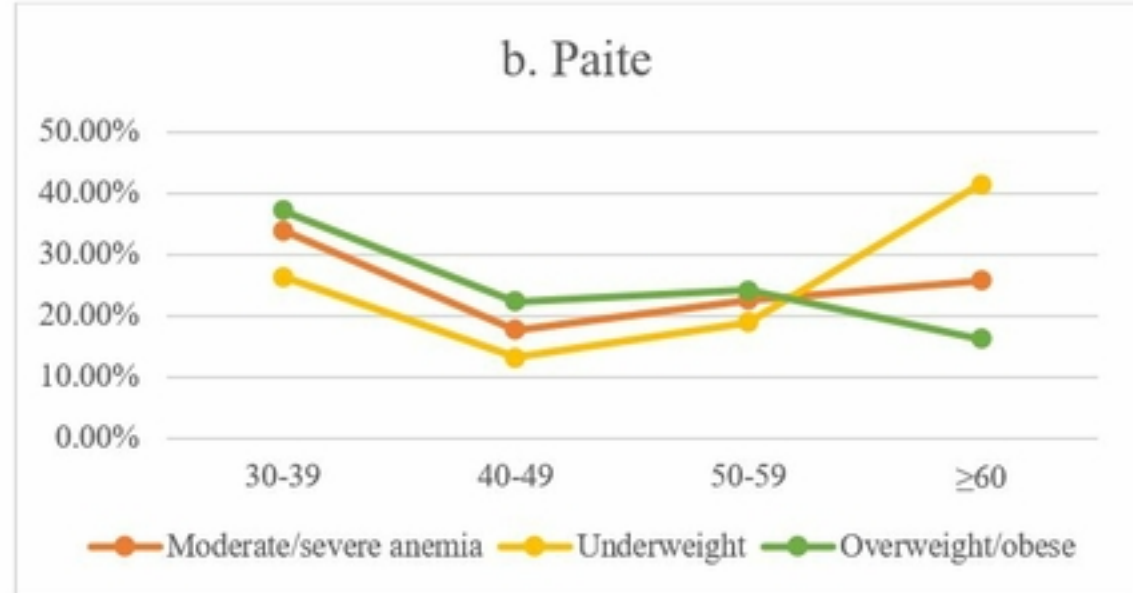

Figure 4: a) Distribution of age cohort (10 years) with moderate/severe anemia along with underweight and overweight/obese subjects among Kuki community. b). Distribution of age cohort (10 years) with moderate/severe anemia along with underweight and overweight/obese subjects among Paite community.

Figure



a. Kuki

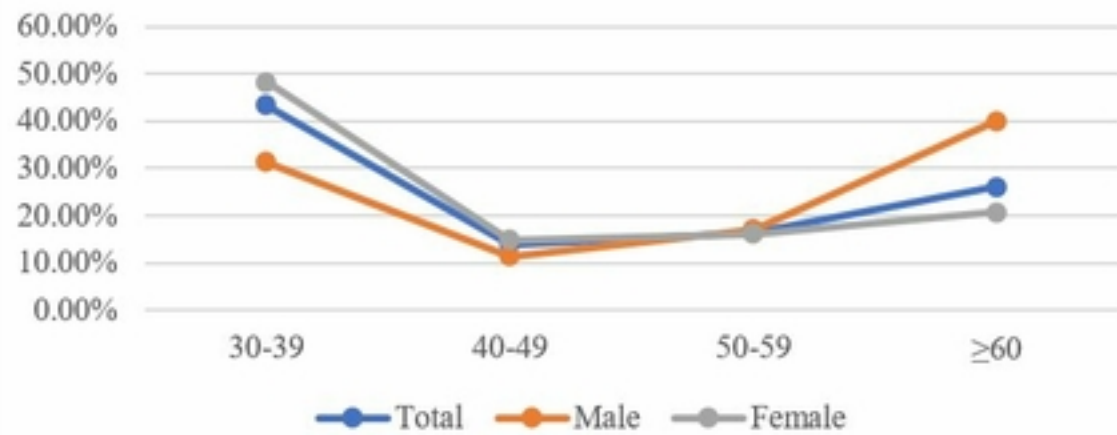

b. Paite

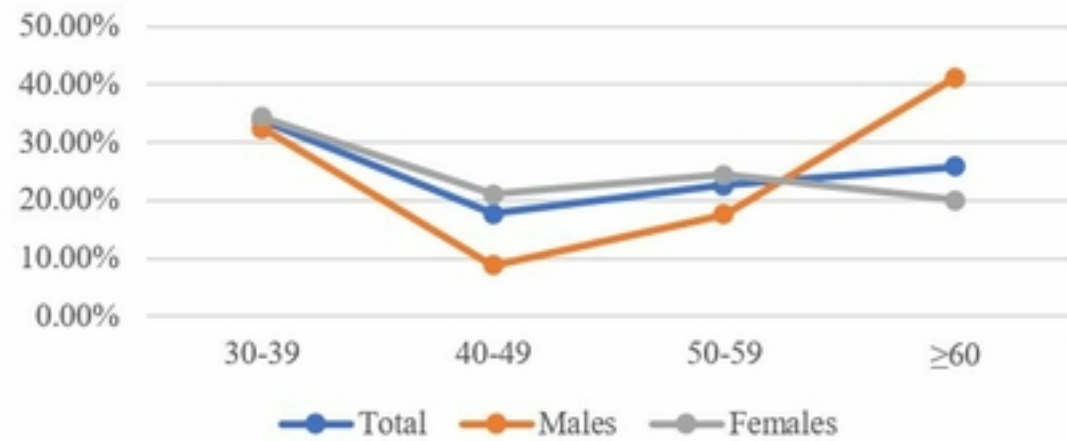

Figure 2: a). Distribution of age cohort (10 years) with moderate/severe anemia among Kuki community. b). Distribution of age cohort (10 years) with moderate/severe anemia among Paite community.

Figure

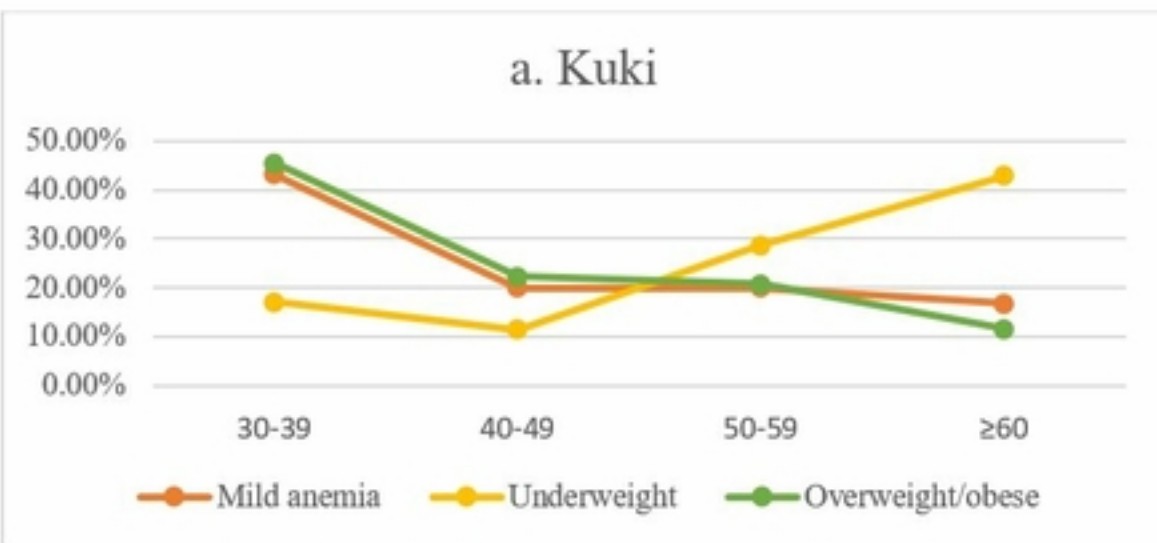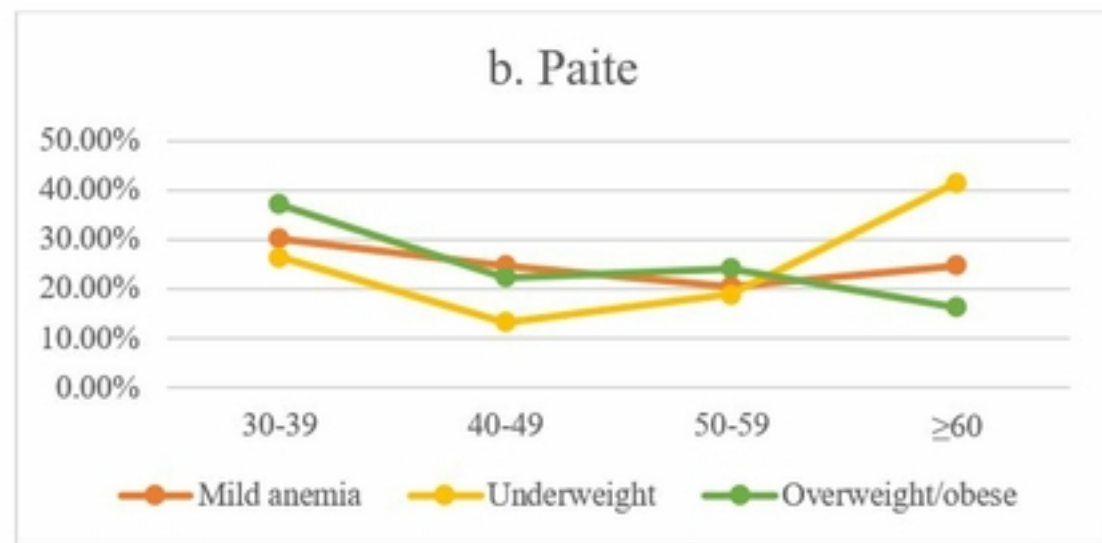

Figure 3: a). Distribution of age cohort (10 years) with mild anemia along with underweight and overweight/obese subjects among Kuki community. b). Distribution of age cohort (10 years) with mild anemia along with underweight and overweight/obese subjects among Paite community.

Figure
